# Supplementary material for: Synthesis and solid state characterization of hexacoordinated 1 : 1 ionic gallium(iii) complexes
Source: Royal Society of Chemistry journal article supplement (doi:10.1039/b716288j), 2007-12-20

Figure S1 Absorption (a) and emission spectra of freshly prepared film (solid line) and after 48h (b).

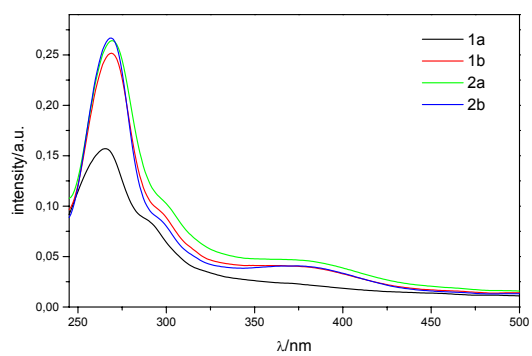

(a)

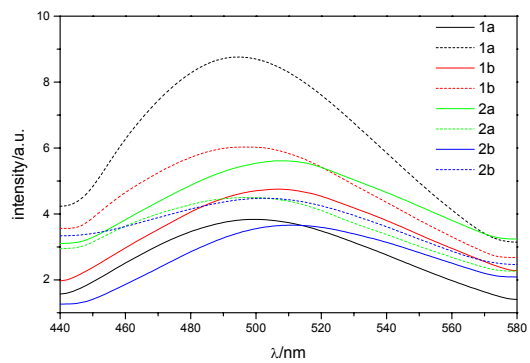

(b)

Figure S2 X-ray diffraction pattern of **2b** of the amorphous state in the thin film freshly prepared.

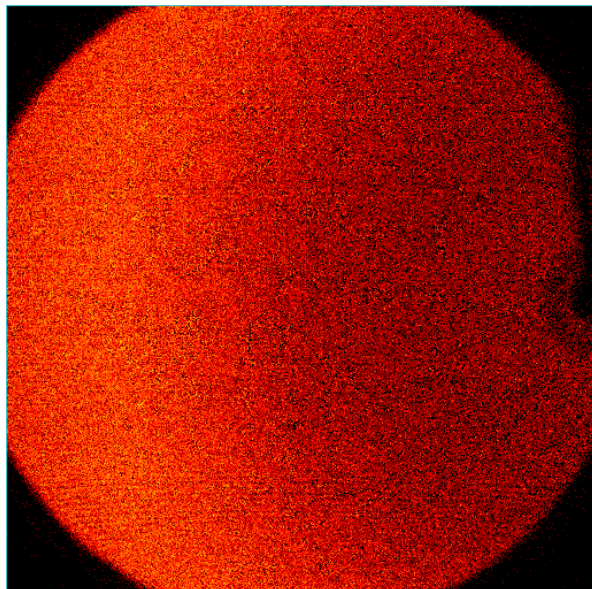

Supplement: b716288j.pdf [file b716288j.pdf]
